# Supplementary material
Source: ML conference proceedings conference paper supplement (https://proceedings.mlr.press/v139/zhang21r.html)
Supplement: Supplementary file 1 [file zhang21r-supp.zip]

Archive with 1 entries (1 files):
- DDQ_appendix.pdf
